# Supplementary material for: Differentiation and molecular heterogeneity of inhibitory and excitatory neurons associated with midbrain dopaminergic nuclei
Source: Oxford University Press journal article supplement (doi:10.1242/dev.129957), 2015-01-01
Supplement: dev129957supp.pdf [file dev129957supp.pdf]

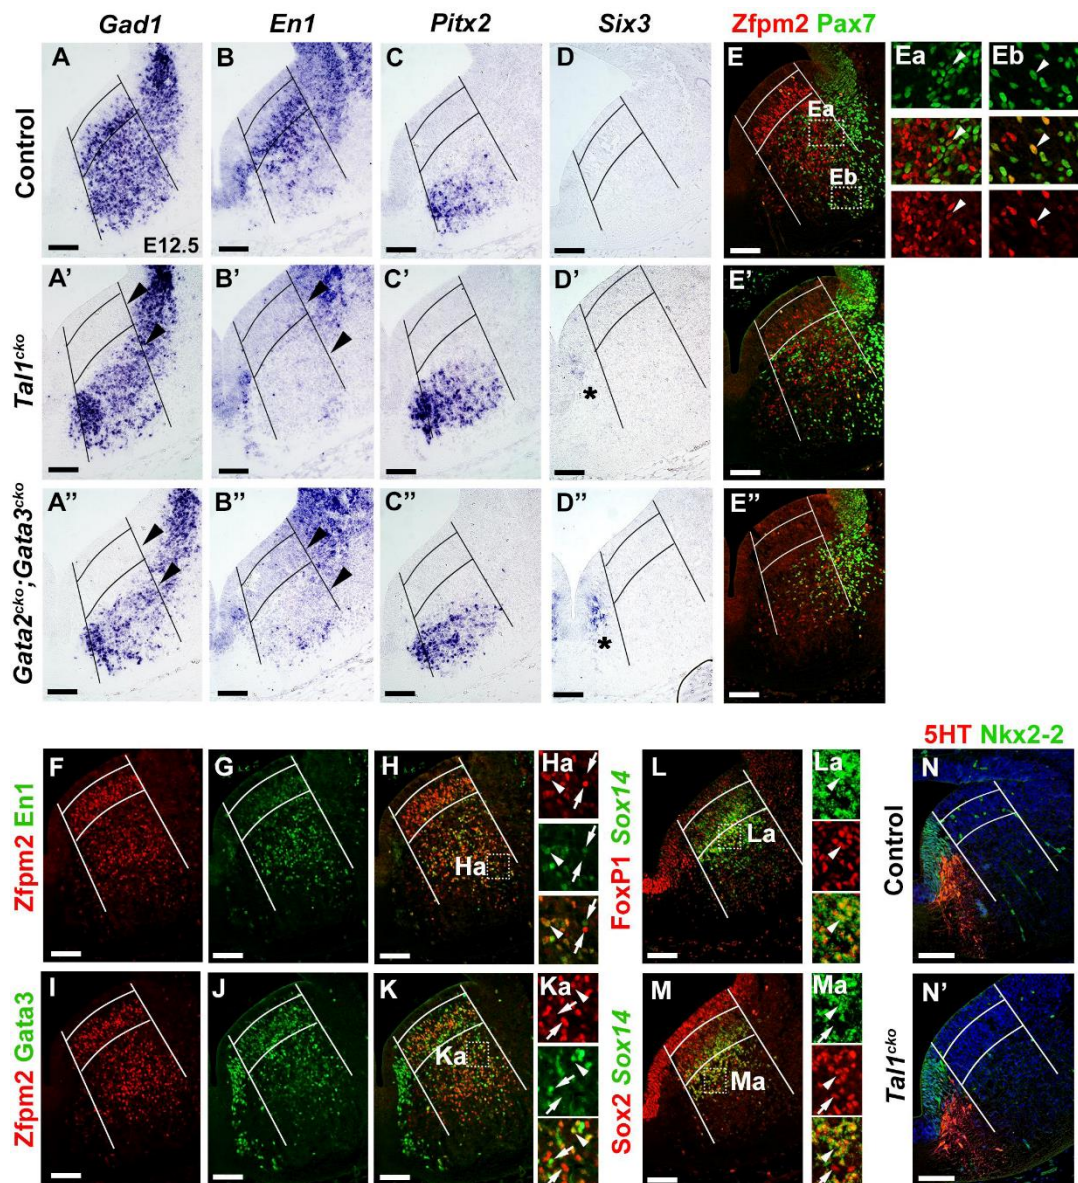

### Supplementary Figure S1. *Tal1* and *Gata2/3* dependent and independent GABAergic neuron subtypes in r1.

(A-N') ISH (A-D'), fluorescent ISH and IHC (L-M, close-ups in La, Ma) and IHC (E-E', F-K, N, N'), with higher magnification images in Ea, Eb, Ha-Ma) of transversal sections of r1. *Gad1* expression is shown here as a reference. The rV2 domain is indicated with lines, with boundaries of ventricular zone (vz), mantle zone 1 (mz1) and mantle zone 2 (mz2) defined similarly as in Figure 1. Black arrowheads (A'-B'') point to altered gene expression. White arrowheads indicate coexpression and white arrows lack of co-expression in (Ea-Ma). An asterisk (\*) indicates ectopic *Six3* expression, which is detected very weakly in *Tal1<sup>cko</sup>* (D') and more strongly in *Gata2<sup>cko</sup>;Gata3<sup>cko</sup>* (D'') mutants. This may be indicative of precursor fate transformation in the ventral *Nkx2-2<sup>+</sup>* domain of the mutants (M.H., L.T., M.S., J.P., in preparation). Scale bars 200  $\mu$ m.

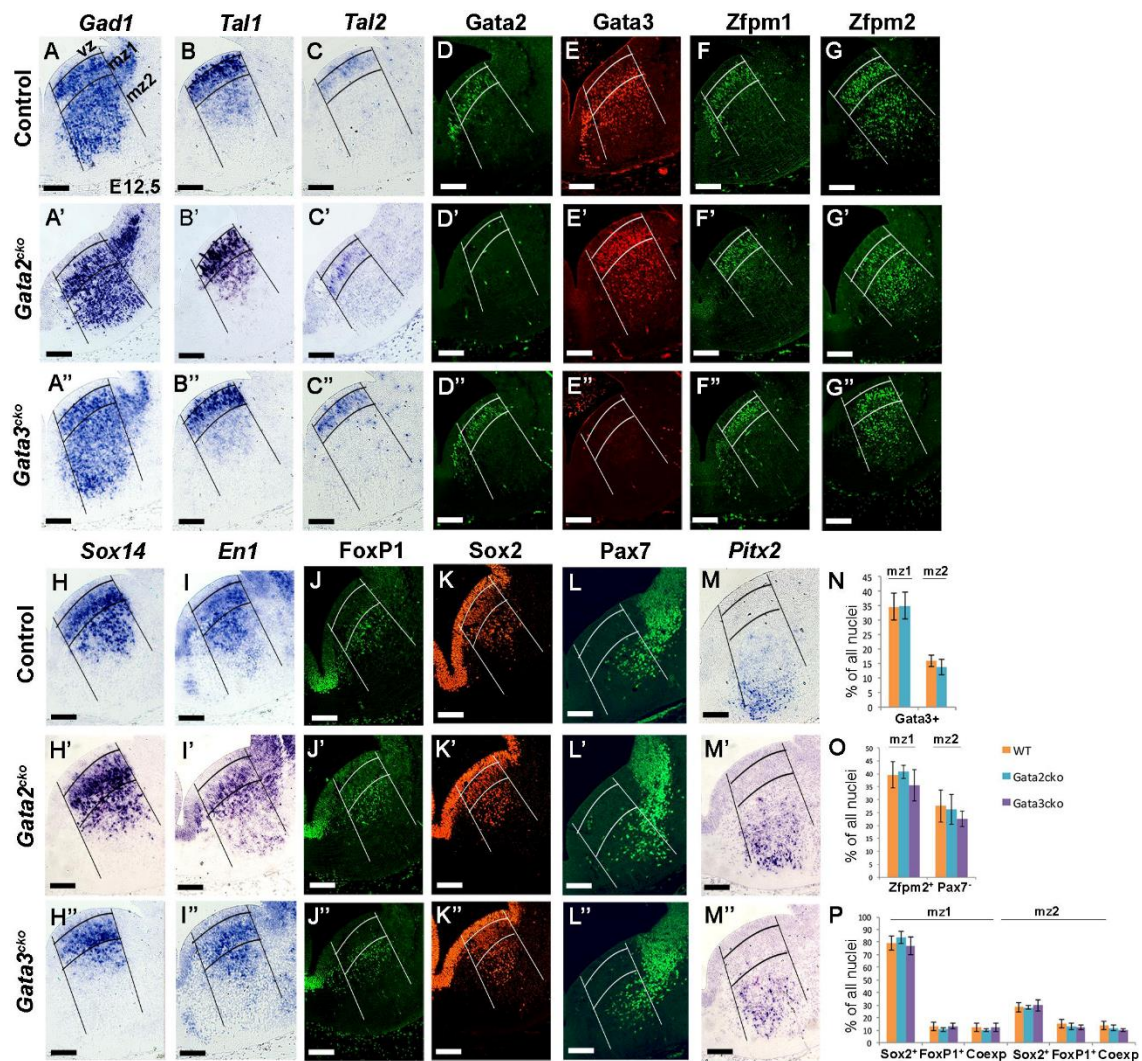

**Supplementary Figure S2. GABAergic precursors in *Gata2<sup>cko</sup>* and *Gata3<sup>cko</sup>* r1.**

(A-M'') ISH in (A-C'',H-I'',M-M'') and IHC (D-G'',J-L'') on transversal sections of E12.5 r1 showing no apparent alterations between the control and mutant embryos. The rV2 domain is indicated with lines, and the boundaries of ventricular zone (vz), mantle zone 1 (mz1) and mantle zone 2 (mz2) defined similarly as in Figure 1. (N-P) The percentage of Gata3<sup>+</sup>, Zfp2<sup>+</sup>Pax7<sup>-</sup>, and Sox2<sup>+</sup>, FoxP1<sup>+</sup>, Sox2<sup>+</sup>FoxP1<sup>+</sup> nuclei represented as averages with s.d. (n=3 in all genotypes). In all comparisons, p>0.05. Scale bars 200 μm.

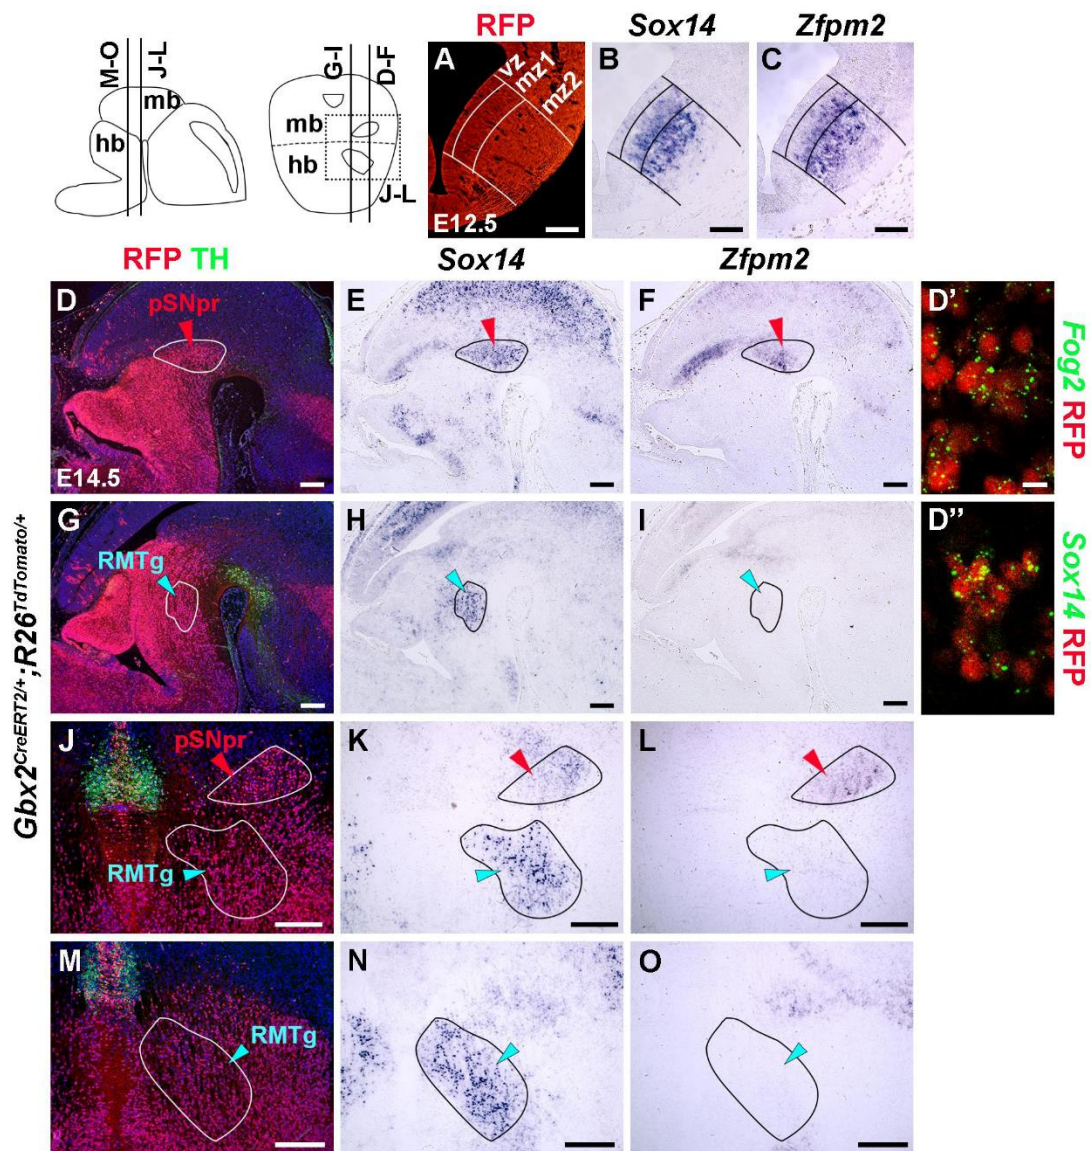

**Supplementary Figure S3. Development of pSNpr and RMTg from *Sox14*<sup>+</sup> and *Zfp2*<sup>+</sup> cells in r1.**

(A-C) IHC (A) and ISH (B-C) on adjacent coronal sections of an E12.5 *Gbx2*<sup>CreERT2</sup>;*R26*<sup>TdTomato</sup> embryo. The rv2 domain is indicated with lines together with ventricular zone (vz), mantle zone 1 (mz1) and mantle zone 2 (mz2). (D-O) IHC (D,G,J,M), ISH (E-F,H-I,K-L,N-O), and combined fluorescent ISH with IHC (D', D'') on sagittal (D-I, D', D'') and coronal (J-O) sections of E14.5 *Gbx2*<sup>CreERT2</sup>;*R26*<sup>TdTomato</sup> embryos. (D', D'') close-ups from the SNpr area (indicated in D). RMTg, rostromedial tegmental nucleus; pSNpr, posterior substantia nigra pars reticulata. Scale bars 100 μm in (A-C), 200 μm in (D-O) and 5 μm in (D', D'').

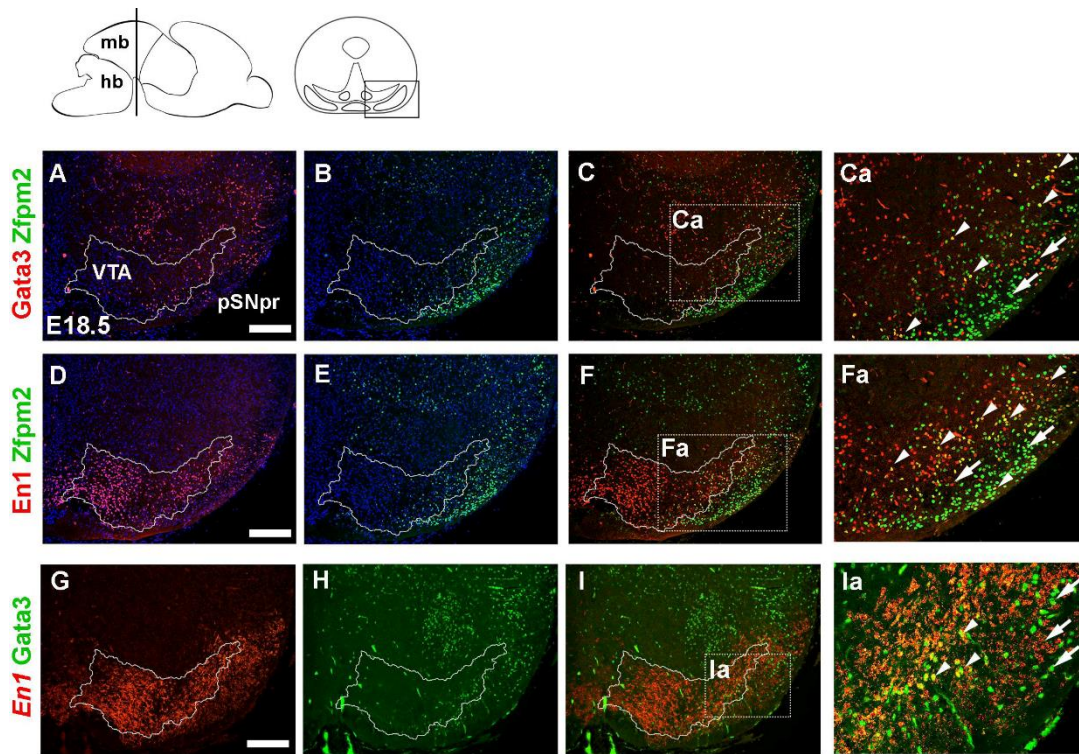

**Supplementary Figure S4. GABAergic neuron subtypes in pSNpr.**

(A-Ia) IHC (A-Fa) and ISH and IHC (G-Ia) on adjacent coronal sections of E18.5 VTA and pSNpr region, with higher magnification images of the boxed areas in (Ca,Fa,Ia). The boundaries of dopaminergic nuclei were based on TH-stainings on a parallel section (not shown). Arrowheads point to coexpressing and arrows to non-coexpressing cells. VTA, ventral tegmental area; pSNpr, posterior substantia nigra pars reticulata. Scale bars 200  $\mu$ m.

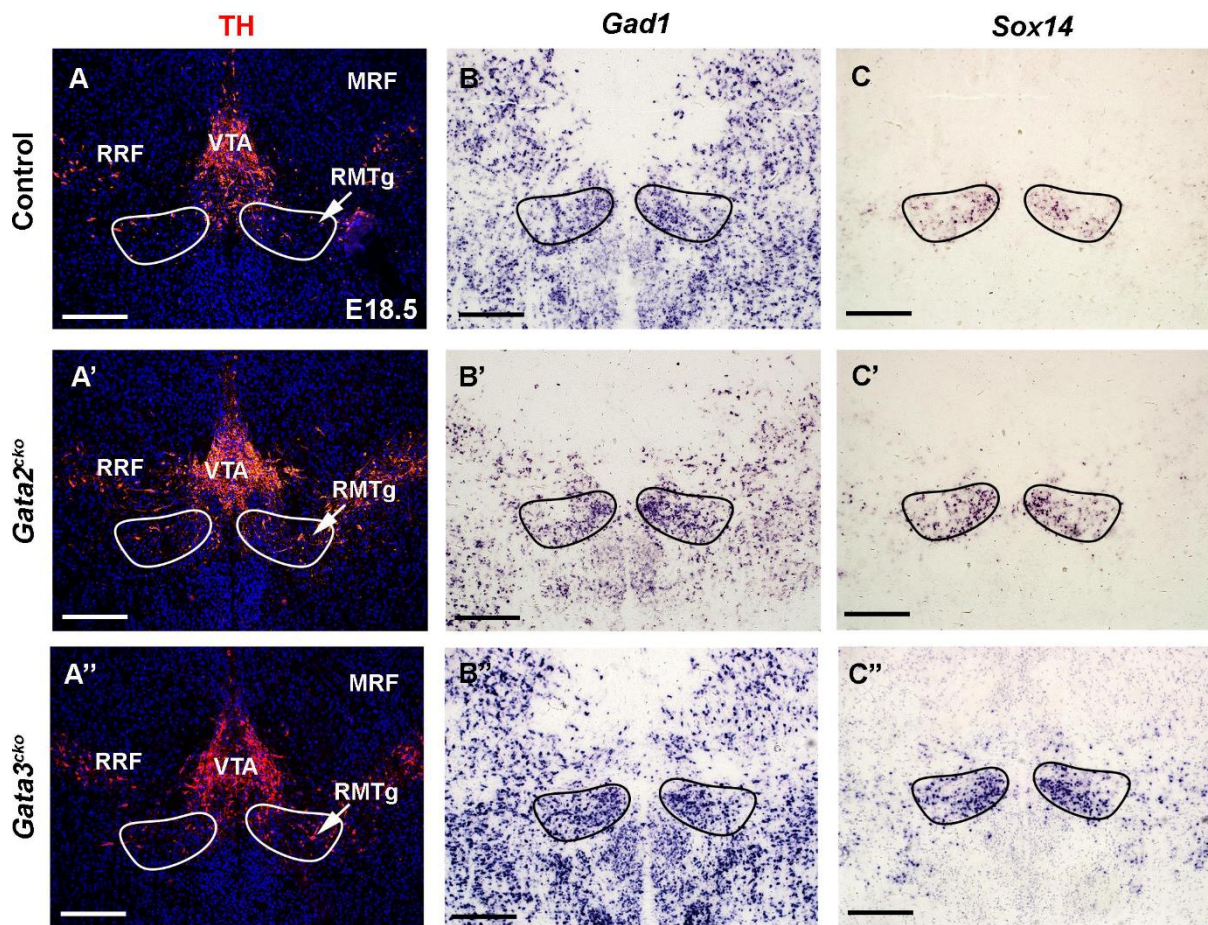

**Supplementary Figure S5. RMTg in *Gata2*<sup>cko</sup> and *Gata3*<sup>cko</sup> mutants.**

(A-C'') IHC (A-A'') and ISH (B-C'') on adjacent coronal sections. RMTg is circled based on *Sox14* expression. IPN, interpeduncular nucleus; MRF, midbrain reticular formation; RMTg, rostromedial tegmental nucleus; RRF, retrosubthalamic field; VTA, ventral tegmental area. Scalebars 200  $\mu$ m.

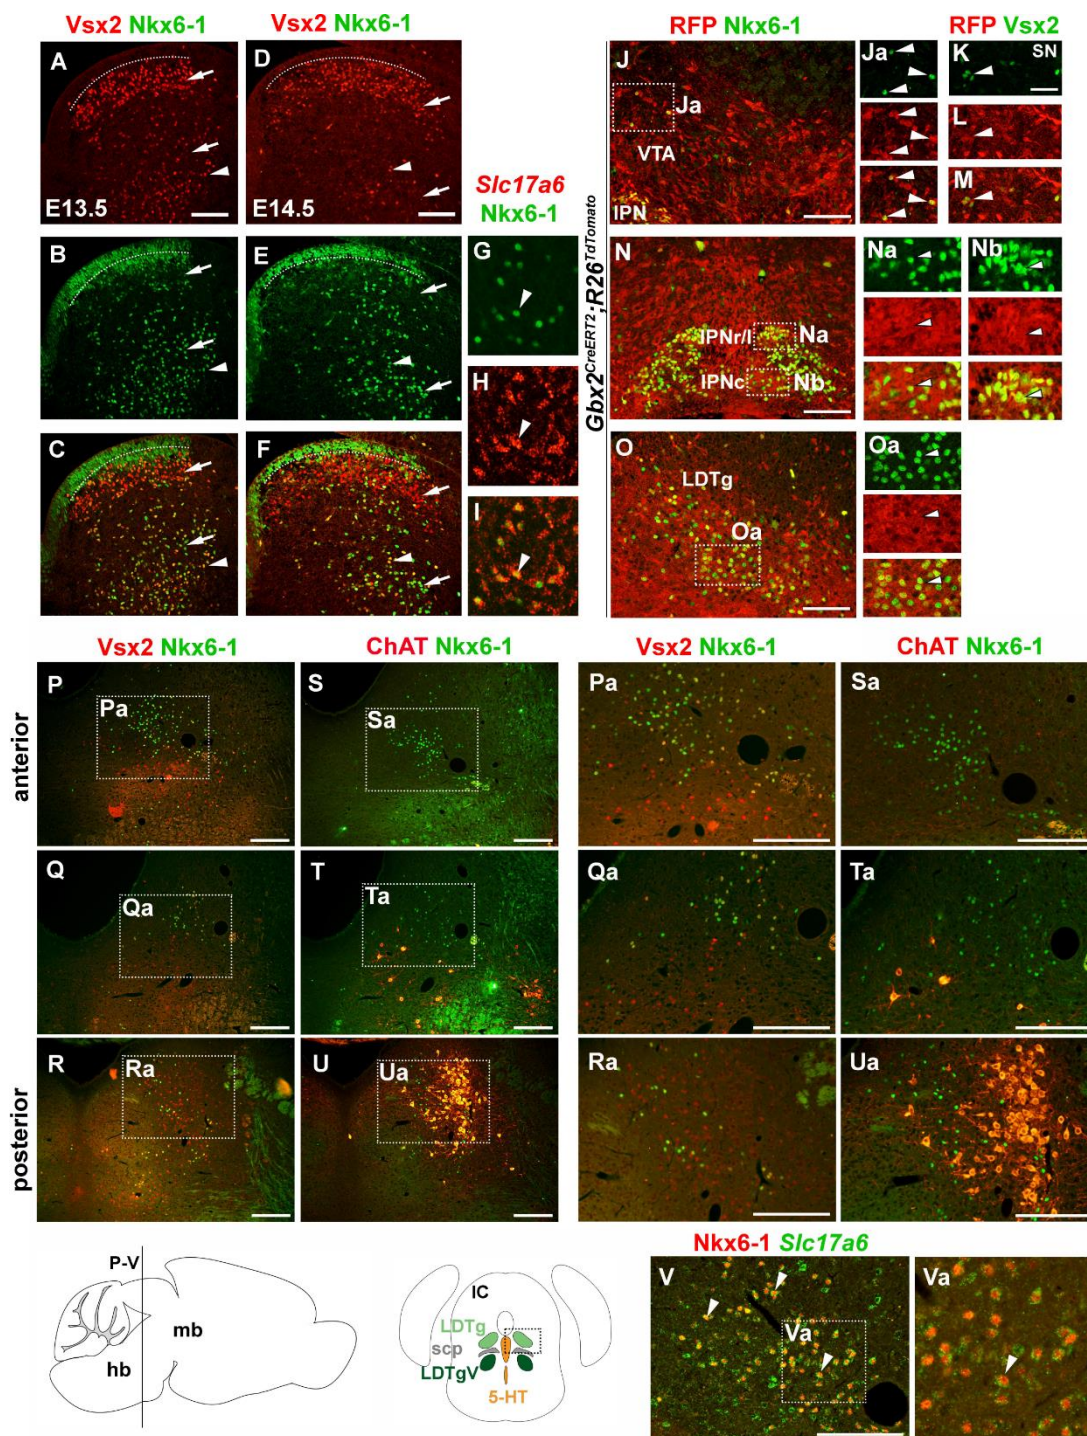

**Supplementary Figure S6. *Vsx2*<sup>+</sup> and *Nkx6-1*<sup>+</sup> glutamatergic neurons in the embryonic and postnatal brain.**

(A-F) IHC in E13.5 and E14.5 transversal sections of r1, depicting the separation of *Vsx2*<sup>+</sup>, *Nkx6-1*<sup>+</sup>, and double-positive neuronal populations. (G-I) ISH and IHC on E14.5 r1, showing coexpression of *Slc17a6* and *Nkx6-1*. (J-O) IHC on E18.5 *Gbx2<sup>CreERT2</sup>;R26<sup>TdTomato</sup>* embryos from VTA (J,Ja), SN (K-

M), IPN (N-Nb) and LDTg (O-Oa). **(P-Ua)** IHC on adult brain LDTg region, the area indicated in the schematic figure below. Nkx6-1<sup>+</sup> and Vsx2<sup>+</sup> are localized near ChAT<sup>+</sup> cholinergic neurons, but forming their own subnuclei. **(V)** *Slc17a6* ISH and Nkx6-1 IHC on an adjacent section to **(P)**, showing glutamatergic identity of Nkx6-1<sup>+</sup> neurons. Close-up view **(Va)**. In all images, arrowheads indicate coexpression, and arrows lack of coexpression. 5-HT, serotonergic neurons; hb, hindbrain; IC, inferior colliculus; IPNc, central interpeduncular nucleus; IPNr/l, rostral/lateral interpeduncular nucleus; LDTg, laterodorsal tegmental nucleus; LDTgV, ventral part of laterodorsal tegmental nucleus; mb, midbrain; scp; superior cerebellar peduncle; SN, substantia nigra; VTA, ventral tegmental area. Scalebars 100 μm (A-F,J-O,V), 50 μm (K), 400 μm (P-Ua).

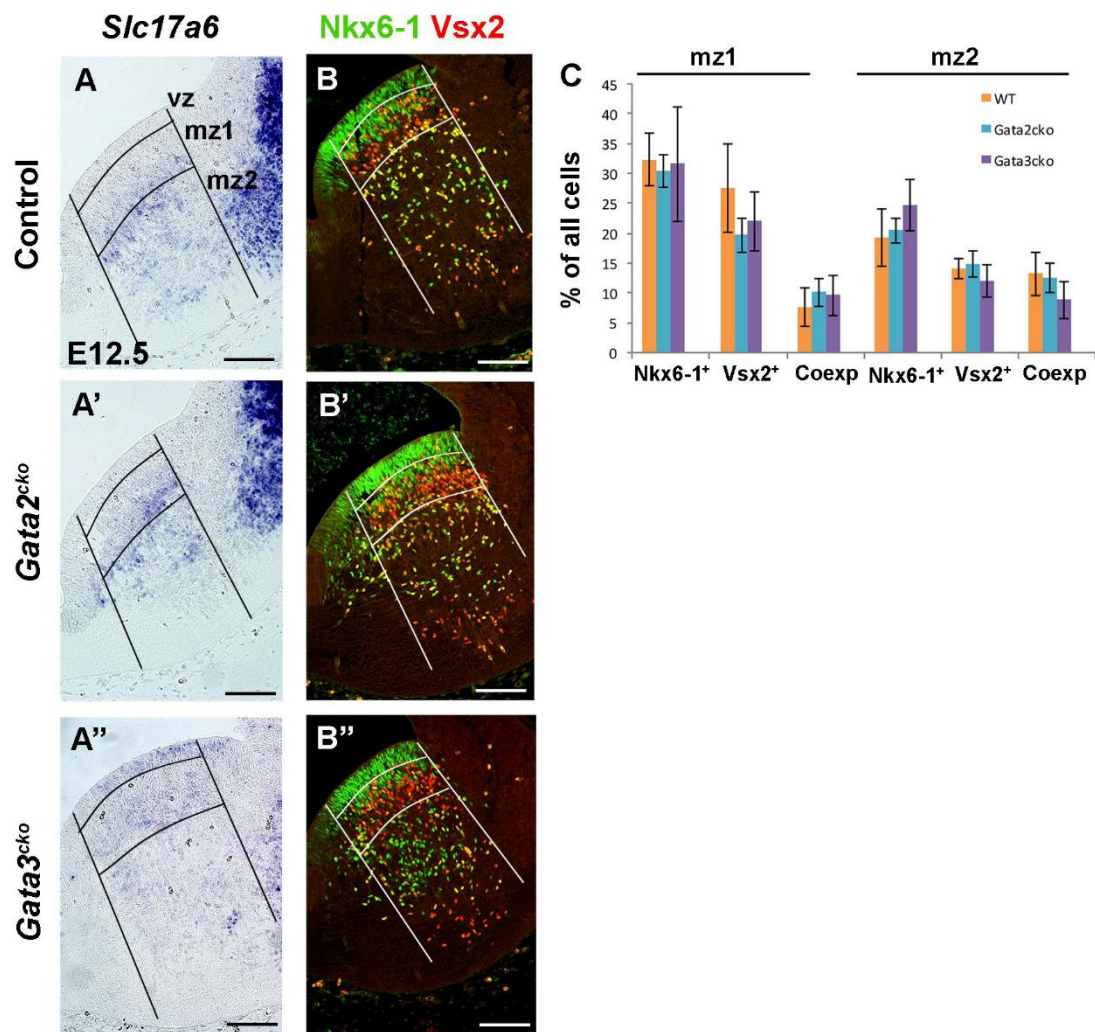

**Supplementary Figure S7. *Vsx2*<sup>+</sup> and *Nkx6-1*<sup>+</sup> glutamatergic neuron precursors in *Gata2*<sup>cko</sup> and *Gata3*<sup>cko</sup> r1.**

ISH (A-A'') and IHC (B-B'') on transversal sections of r1. The rV2 domain is indicated with lines, and the boundaries of ventricular zone (vz), mantle zone 1 (mz1) and mantle zone 2 (mz2) defined similarly as in Figure 1. (C) The percentages of *Nkx6-1*<sup>+</sup>, *Vsx2*<sup>+</sup>, and double-positive nuclei in mz1 and mz2, shown as averages with s.d. (n=3 in all genotypes). In all comparisons p>0.05. Scale bars 200 μm.



Supplementary Table S1. List of primary antibodies

| Antigen | Species raised in | Supplier                             | Cat. No        | Dilution |
|---------|-------------------|--------------------------------------|----------------|----------|
| 5-HT    | Rabbit            | Immunostar                           | 20080          | 1:500    |
| ChAT    | Goat              | Merck Millipore                      | AB144P         | 1:100    |
| En1     | Mouse             | Developmental Studies Hybridoma Bank | 4G11           | 1:200    |
| FosB    | Rabbit            | Santa Cruz Biotechnology             | sc-7203        | 1:400    |
| FosB    | Mouse             | Abcam                                | ab11959        | 1:500    |
| FoxP1   | Rabbit            | Abcam                                | ab16645        | 1:400    |
| Gata2   | Rabbit            | Santa Cruz Biotechnology             | sc-9008        | 1:200    |
| Gata3   | Mouse             | Santa Cruz Biotechnology             | HG3-3I sc-268  | 1:200    |
| GFP     | Rabbit            | Abcam                                | ab290          | 1:800    |
| GFP     | Mouse             | Merck Millipore                      | MAB3580        | 1:500    |
| Nkx6-1  | Mouse             | Developmental Studies Hybridoma Bank | F55A10         | 1:1000   |
| Olig2   | Goat              | Neuromics                            | GT15132        | 1:200    |
| Pax7    | Mouse             | Developmental Studies Hybridoma Bank | Pax7           | 1:400    |
| RFP     | Rabbit            | Rockland                             | 600-401-379    | 1:400    |
| Sox2    | Rabbit            | Merck Millipore                      | AB5603         | 1:400    |
| Sox2    | Mouse             | Abcam                                | ab79351        | 1:800    |
| TH      | Rabbit            | Merck Millipore                      | AB152          | 1:500    |
| TH      | Mouse             | Merck Millipore                      | MAB318         | 1:500    |
| Vsx2    | Sheep             | Abcam                                | ab16141        | 1:400    |
| Zfpm1   | Goat              | Santa Cruz Biotechnology             | M-20 sc-9361   | 1:400    |
| Zfpm2   | Rabbit            | Santa Cruz Biotechnology             | M-247 sc-10755 | 1:400    |
| Zfpm2   | Mouse             | Santa Cruz Biotechnology             | H-5 sc-398011  | 1:400    |
